# 1 **The protein-binding pocket of Botulinum neurotoxin B accommodates a preassembled** 2 **synaptotagmin / ganglioside complex**

## 5 **Authors**

6 Jorge Ramirez-Franco,<sup>1†</sup> Fodil Azzaz,<sup>1†</sup> Marion Sangiardi,<sup>1</sup> Géraldine Ferracci,<sup>2</sup> Fahamoe  
7 Youssouf,<sup>1</sup> Michel R. Popoff,<sup>3</sup> Michael Seagar,<sup>1</sup> Christian Lévêque,<sup>1\*</sup> Jacques Fantini,<sup>1</sup>  
8 Oussama EL FAR<sup>1\*</sup>

## 10 **Affiliations**

11 <sup>1</sup>UMR 1072, INSERM, Unité de Neurobiologie des canaux Ioniques et de la Synapse,  
12 Aix-Marseille Université, 13015 Marseille, France.

13 <sup>2</sup>Aix-Marseille Université, CNRS, INP, Institute of Neurophysiopathology, UMR7051,  
14 PINT, PFNT, Marseille, France.

15 <sup>3</sup>Institut Pasteur, Unité des Toxines Bactériennes, UMR CNRS 2001, Paris, France.

16 <sup>†</sup>These authors contributed equally to this work

17 <sup>\*</sup>Corresponding authors. Email: christian.leveque@univ-amu.fr (CL); oussama.el-  
18 far@inserm.fr (OEF)

## 20 **Abstract**

21 **Botulinum neurotoxin serotype B (BoNT/B) uses two separate protein and**  
22 **polysialoglycolipid-binding pockets to interact with synaptotagmin 1/2 and gangliosides.**  
23 **However, an integrated model of BoNT/B bound to its neuronal receptors in a native**  
24 **membrane topology is still lacking. Using a panel of in silico and experimental approaches,**  
25 **we present here a new model for BoNT/B binding to neuronal membranes, in which the toxin**  
26 **binds to a preassembled synaptotagmin-ganglioside GT1b complex and a free ganglioside.**  
27 **This interaction allows a lipid-binding loop of BoNT/B to engage in a series of concomitant**  
28 **interactions with the glycone part of GT1b and the transmembrane domain of synaptotagmin.**  
29 **Furthermore, our data provide molecular support for the decrease in BoNT/B sensitivity in**  
30 **Felidae that harbor the natural variant synaptotagmin2-N<sub>59</sub>Q. These results reveal multiple**  
31 **interactions of BoNT/B with gangliosides and support a novel paradigm in which a toxin**  
32 **recognizes a protein/ganglioside complex.**  
33

34

35

36 **Teaser:** A new molecular mechanism for botulinum neurotoxin type B binding

37

38 **Short title**

39 A new molecular mechanism for BoNT/ B binding

40

41 **Introduction**

42 Botulinum neurotoxins (BoNTs), are a family of potent protein toxins produced by anaerobic gram-  
43 positive Clostridia (1) (2). BoNTs are classified as seven different serotypes from BoNT/A to G,  
44 further divided into subtypes with different amino acid sequences, although additional BoNTs are  
45 still being discovered, including mosaic toxins derived from a combination of different serotypes  
46 (1) (3).

47 BoNTs are the etiological agents of botulism, a rare but severe disease affecting many vertebrates,  
48 which results from the inhibition of acetylcholine release in the peripheral nervous system, causing  
49 flaccid paralysis. At the same time, BoNT/A, and to a lesser extent BoNT/B, are widely exploited  
50 for therapeutic applications (4) (5) (6).

51 BoNTs intoxicate neurons using a multistep mechanism based on a tri-modular neurotoxin design.  
52 BoNTs are structurally similar to AB toxins with a 100 kDa heavy chain (HC) and a 50 kDa  
53 catalytic light chain, associated via a disulphide bond and non-covalent interactions. After entering  
54 the circulation, BoNTs target high affinity receptors on peripheral nerve terminals via the HC  
55 domain. The amino-terminal domain of the HC then translocates the enzymatic light chain into the  
56 cytoplasm where the latter cleaves one of the three intracellular SNARE proteins (VAMP1-3,  
57 SNAP-25 or syntaxin 1) necessary for synaptic vesicle fusion and neurotransmitter release (5). The  
58 BoNT carboxyl-terminal sub-domain of HC, organized into a  $\beta$ -trefoil fold, displays two  
59 independent binding pockets, which bind two distinct classes of receptors.

60 The first receptor to be discovered is a ganglioside, typically GT1b or GD1a, that is recognized by  
61 a ganglioside-binding site (GBS1), conserved in most BoNTs. Gangliosides are a family of diverse  
62 amphipathic glycosphingolipids abundantly expressed in the outer leaflet of all vertebrate cells.  
63 GM1, GD1a, GD1b and GT1b represent the vast majority (>90%) of adult mammalian brain  
64 gangliosides, composed of a ceramide, imbedded in the outer leaflet of the plasma membrane,  
65 linked to a common tetrasaccharide core with sialic acids attached to galactose residues (7).  
66 Gangliosides associate with cholesterol in tightly packed lipid domains that are in dynamic  
67 equilibrium with less ordered membrane regions and can support lipid and protein-lipid interactions

68 in *cis* and *trans* configurations (7) (8). Moreover, microdomains containing gangliosides provide  
69 an entry pathway for several viruses and other pathogens (9) (10) (11).

70 The second receptor is a protein, corresponding to the luminal sequence of a synaptic vesicle  
71 protein: synaptotagmin 1 and 2 (SYT) for BoNT/B, G and the mosaic toxin BoNT/DC or SV2 for  
72 BoNT/A, D, E, F although the identity of BoNT/D protein receptor is still to be confirmed (2).  
73 BoNT/C has no identified protein receptor, but like BoNT/D, harbors an additional ganglioside-  
74 binding pocket distinct from GBS1 and termed “sialic-binding site” that overlaps with the SYT-  
75 binding pocket of BoNT/B, contributing to toxicity (12) (13) .

76 Besides these two receptors, a solvent-exposed lipid-binding loop (LBL), present in BoNT/B, C,  
77 D, G and BoNT/DC is localized between GBS1 and the protein (BoNT/B, G and DC) or sialic acid-  
78 binding pocket (BoNT/C and BoNT/D), participates in the recognition of neuronal membranes (2)  
79 (14). This loop interacts with lipids and/or gangliosides and its deletion reduces dramatically BoNT  
80 toxicity, but it is not clear whether it can directly bind to the carbohydrate part of gangliosides (14)  
81 (15). Notably, tetanus toxin a Clostridium neurotoxin structurally related to BoNTs and sharing the  
82 highest sequence identity with BoNT/B, also has an LBL in addition to two ganglioside binding  
83 sites, like BoNT/C (16).

84 The exceptional neurotropism of BoNT/B is conferred by interaction with the extracellular  
85 juxtamembrane domain (JMD) of SYT, that is translocated to the plasma membrane by synaptic  
86 vesicle fusion. SYT1 and SYT2 have comparable biochemical properties and similar functions,  
87 regulating exo-endocytic recycling of synaptic vesicles by interacting with cytosolic proteins such  
88 as the adaptor protein AP2, as well as with specific lipids like cholesterol and PIP2 (17) (18) (19).  
89 While SYT1 is widely distributed in terminals of autonomic and sensory neurons, as well as in  
90 some neuromuscular junctions, SYT2 is the dominant isoform at most neuromuscular junctions (5).  
91 Co-crystallization data indicate that BoNT/B binds SYT1 and SYT2 in a very similar manner using  
92 a saddle-shaped pocket interacting with 10–14 SYT JMD residues (20) (21) (22) (6). The  
93 extracellular domain of SYT is not structured in solution, but the JMD of SYT adopts a helical  
94 conformation upon binding to BoNT/B (20) (21) (22) (6). In the absence of gangliosides, BoNT/B  
95 displays a much higher affinity for rat SYT2 (40 nM) than for SYT1, due to a small difference in  
96 primary sequence in the SYT JMD (20). Although BoNT/B has low affinity for GT1b ( $\mu$ M range)  
97 (14) (15), the latter drastically increases BoNT/B affinity ( $\sim$ 0.4 nM) for membranes containing SYT  
98 (23) (24) (25). In detergent, the synergistic effect of GT1b requires the presence of the SYT  
99 transmembrane domain (TMD) (26) (27) and high affinity binding is only reached in reconstituted  
100 systems containing lipids as well as the transmembrane domains of SYT and GT1b, suggesting a  
101 role for the intramembrane segments in toxin binding (22) (24). As the available structural data

102 were obtained in the absence of apolar domains of BoNT/B receptors (21) (20) (22) (6), how  
103 BoNT/B binds to its receptors in a membrane context remains to be elucidated.

104 Recently we reported that the transmembrane and juxtamembrane domains of SYT interact with  
105 complex gangliosides inducing an  $\alpha$ -helical structure (25). A mutation (SYT1-K<sub>52</sub>A) that decreases  
106 GT1b assembly with SYT1, abolished BoNT/B binding in neuroendocrine cells, suggesting that  
107 the preassembly of a GT1b/SYT complex is crucial for BoNT/B interaction. Using a panel of in  
108 silico and experimental approaches, we now report that the SYT-binding pocket of BoNT/B can  
109 accommodate the preassembled GT1b/SYT complex and that the BoNT/B LBL interacts with the  
110 TMD of SYT and its associated GT1b molecule. We thus propose a new model for BoNT/B-SYT  
111 interaction taking into account the membrane topology of neuronal toxin receptors, a parameter that  
112 has not been considered in previous structural studies.

## 113 **Results**

### 114 **BoNT/B binds to SYT pre-assembled with GT1b**

115  
116 The JMD of SYT binds GT1b (25) via a consensus ganglioside-interaction motif that overlaps with  
117 the described BoNT/B-SYT interaction domain (22). We therefore addressed the question as to  
118 whether BoNT/B can bind to a SYT/GT1b complex. To investigate this point, we developed an  
119 SPR-based approach, consisting in capturing a peptide encompassing the JMD of SYT (pSYT1 32-  
120 57 or pSYT2 40-66, fig. S1) on a sensor chip, assembling a SYT/GT1b complex and then evaluating  
121 BoNT/B binding. GT1b diluted in running buffer interacted strongly with pSYT1 or pSYT2  
122 immobilized on a sensor chip (Fig. 1A). The interaction was specific, as no binding occurred on a  
123 control pSYT9 peptide (Fig. 1A, fig. S1). Ganglioside binding to pSYT was detected at 10 nM  
124 GT1b (fig. S2A), a concentration far below its critical micellar concentration (28) and was dose-  
125 dependent (fig. S2B). Estimation of the ganglioside/peptide molar ratio indicated that a mean of 3  
126 molecules of GT1b were bound per peptide ( $3.04 \pm 0.4$ ,  $n = 7$  independent experiments using pSYT1  
127 or pSYT2). This observation is compatible with ceramide-mediated multimeric self-assembly of  
128 gangliosides that occurs in lipid rafts (29). The interaction of the JMD of SYT with GT1b was  
129 further corroborated using antibodies that specifically recognize the JMD of SYT. As shown in fig.  
130 S2C and D, GT1b bound to SYT, masks the recognition domain of anti-SYT JMD antibodies and  
131 inhibits their binding to SYT. Altogether, these results demonstrate that the ganglioside binding site  
132 of the JMD of SYT immobilized on a chip can stably capture GT1b. This experimental protocol  
133 mimics native conditions where SYT binds one GT1b molecule while being surrounded by other  
134 free GT1b molecules thus allowing BoNT/B to interact with SYT/GT1b and free GT1b using the  
135 SYT-binding pocket and GBS1 respectively.  
136

137 We then compared BoNT/B binding to SYT and SYT/GT1b complex. In the absence of GT1b,  
138 BoNT/B binding yielded a transient SPR signal on pSYT1 (Fig. 1B first arrow), consistent with its  
139 reported low affinity (25) (20). GT1b was then immobilized on pSYT1 (Fig. 1B second arrow)  
140 before a subsequent injection of BoNT/B on the SYT/GT1b complex (Fig. 1B last arrow).  
141 Compared to pSYT1 alone, GT1b interaction with pSYT enhanced BoNT/B binding during the  
142 association phase, with a slower dissociation kinetic. This increase in BoNT/B affinity due to GT1b  
143 association with pSYT1 is similar to the effect of GT1b measured in proteoliposomes containing  
144 full length SYT1 (25). The potentiation of BoNT/B binding by GT1b depended on the amount of  
145 gangliosides bound to SYT, reaching a plateau (Fig. 1C, fig. S3A). To rule out the possibility that  
146 GT1b alone produces an enhancement of BoNT/B binding independently of SYT, we used a mutant  
147 SYT1 peptide (F<sub>46</sub>A) that is unable to bind BoNT/B, but still interacts with GT1b (21). As shown  
148 in fig. S3A, in contrast to pSYT1/GT1b complex, BoNT/B did not interact with pSYT1-F<sub>46</sub>A/GT1b  
149 complex in agreement with the low affinity of BoNT/B for gangliosides. BoNT/B binding does not  
150 induce GT1b dissociation from pSYT/GT1b complex, as anti-GT1b antibodies detected the same  
151 amount of GT1b before and after BoNT/B binding (fig. S3B and C). BoNT/B binding to pSYT2  
152 was also measured when GT1b was bound to SYT2, with the difference that BoNT/B signals were  
153 higher on pSYT2 than on pSYT1 in the absence of ganglioside, in accordance with their relative  
154 affinity (Fig. 1, fig. S3D). As for SYT1, the presence of GT1b bound to SYT2, promoted BoNT/B  
155 interaction with SYT2, increasing binding affinity mainly by decreasing the dissociation rate of  
156 BoNT/B from pSYT2 (fig. S3D). Altogether, these results demonstrate that BoNT/B binds to a  
157 preassembled SYT/GT1b complex.

158

### 159 **Molecular modeling of BoNT/B bound to a SYT/GT1b complex**

160 In order to obtain molecular insight into the interaction of BoNT/B with SYT1-GT1b and SYT2-  
161 GT1b complexes, with specific information on the fate of the LBL upon toxin binding, we  
162 developed a molecular modeling strategy that takes into account membrane topology. Using the  
163 initial coordinates of toxin-SYT (PDB 4KBB, 6G5K and 2NP0), we constructed a full system  
164 consisting of a SYT-GT1b complex, a GD1a-toxin complex and a cholesterol molecule. After  
165 several rounds of energy minimization, a stable complex was obtained for both systems including  
166 SYT1 (Fig. 2 A) and SYT2 (Fig. 2 B). The initial conditions had to be slightly adjusted to take into  
167 account the TM domain of SYT and the ceramide part of the GD1a ganglioside which were absent  
168 from the crystal structure. These conformational constraints respected the overall geometry of the  
169 membrane, except that a gap between GD1a and the TM domain of SYT was filled by a cholesterol  
170 molecule (17). BoNT/B interacts with free GD1a and GT1b associated with SYT (~25 % and ~ 15

171 % of the total energy respectively) but in both cases the major contribution of toxin binding was  
172 due to SYT (~ 60% of the total energy) as shown in the pie chart in Fig. 2. A key feature of our  
173 models is the insertion of the LBL loop between GT1b and SYT (Fig. 2, fig. S4B). The overall  
174 energy of interaction of BoNT/B-SYT complex is around -600 kJ/mol (-592 kJ/mole for SYT1  
175 versus -664 kJ/mole for SYT2).

176 *BoNT/B-SYT interaction:* The toxin was found to interact with a significant part of the extracellular  
177 regions of SYT1 (E<sub>36</sub>-W<sub>58</sub>) and SYT2 (E<sub>44</sub>-W<sub>66</sub>) via the SYT binding pocket, including loops Y<sub>1183</sub>-  
178 K<sub>1188</sub>, P<sub>1197</sub>-D<sub>1202</sub> and K<sub>1113</sub>-P<sub>1117</sub> (fig. S4A, Fig. 3). The SYT helix, pre-conformed by GT1b,  
179 extends from E<sub>36</sub> to H<sub>51</sub> in SYT1 and E<sub>44</sub> to N<sub>59</sub> in SYT2, whereas a small distortion of the helix  
180 was observed in the central part of BoNT/B-SYT interface (Fig. 2, fig. S4A). Almost all amino  
181 acids of BoNT/B that interact with SYT in the crystal structure were found in contact with SYT  
182 and/or GT1b in our models (Table S1). However, the conformational adjustment induced by the  
183 TM domain of SYT slightly turned the helix, generating a different interaction map with BoNT/B,  
184 compared to the BoNT/B-SYT binding interface determined by X-ray diffraction crystallography  
185 without membrane constraints. A detailed analysis of the contribution of amino acid residues of  
186 SYT and of the toxin revealed the evolution of the complex between the initial crystal conditions  
187 and the presented models (Table S1, Table S2). SYT1-F<sub>46</sub> and SYT2-F<sub>54</sub>, which initially interacted  
188 with GT1b in SYT/GT1b complexes (25), engage interactions with residues 1115-1117 of the toxin  
189 while retaining ganglioside association (Fig. 3, Fig. 5, fig. S5). A superposition of the crystal  
190 structure with our models is shown in Fig. 4 for SYT1-F<sub>46</sub> and M<sub>47</sub> and its SYT2 counterparts that  
191 are described as key energetic hotspot residues in the crystal structure. In the case of SYT1 the  
192 aromatic ring of F<sub>46</sub> (white) is replaced in the model by the apolar side chain of M<sub>47</sub> (Fig. 4A, light  
193 blue). Consequently, most of the amino acid residues of the toxin that were in contact with F<sub>46</sub> now  
194 interact with M<sub>47</sub>. In the case of SYT2 a similar substitution was evidenced between F<sub>54</sub> in the  
195 crystal structure (white) and F<sub>55</sub> in our model (Fig. 4B, light blue). Interestingly the aromatic ring  
196 of both residues is oriented in a similar way so that the pi-pi network involving residues Y<sub>1183</sub>, F<sub>1194</sub>  
197 and F<sub>1204</sub> of the toxin was still operative. These models uncover several additional SYT JMD  
198 residues compared to crystal data (E<sub>36</sub>, D<sub>37</sub>, S<sub>40</sub>, K<sub>41</sub>, Q<sub>44</sub>, N<sub>48</sub>, H<sub>51</sub> in SYT1 and E<sub>44</sub>, A<sub>48</sub>, K<sub>49</sub>, E<sub>52</sub>,  
199 N<sub>56</sub>, N<sub>59</sub> in SYT2) (Fig. 3, Table S2). Among them, SYT1-H<sub>51</sub> and SYT2-N<sub>59</sub> residues are facing  
200 the toxin and exhibit a high energy of interaction involving BoNT/B residues Y<sub>1183</sub>, K<sub>1187</sub>, E<sub>1191</sub> and  
201 E<sub>1203</sub> (Fig S6). In addition to the SYT/binding pocket, the BoNT/B LBL participates in the toxin-  
202 SYT complex by interacting tightly with apolar extramembrane (L<sub>50</sub>, I<sub>53</sub>, L<sub>55</sub>, P<sub>56</sub>) and membrane-  
203 embedded (A<sub>59</sub>, A<sub>62</sub>, I<sub>63</sub>, V<sub>66</sub>) residues of SYT1 (Fig. 3, Table S2A). Similar interactions were  
204 observed with homologous residues of SYT2 (Fig. 3, Table S2B).

205 *SYT-GT1b interaction*: GT1b imposes an angle of about 45° between the JMD of SYT and the  
206 membrane (Fig. 2). The mapping of the molecular interactions between GT1b and either SYT1  
207 (Fig. 5 A) or SYT2 (Fig. 5 B) and the toxin revealed that the binding involved the ceramide part of  
208 GT1b and the four terminal sugars and sialic acids (Glc1 and Gal2 are not involved in binding).  
209 The overall binding energy between SYT and GT1b was conserved upon interaction with BoNT/B  
210 (Table S2). Interestingly, we noted a rearrangement involving F<sub>46</sub> in SYT1 and its homologous F<sub>54</sub>  
211 in SYT2 that reinforced the interaction with GT1b upon toxin binding (+32% and +90% for SYT1  
212 and SYT2 respectively), involving Gal4, Sia5 and Sia6 (Fig. 5, Table S2, fig. S7). In contrast,  
213 SYT1-K<sub>52</sub>, I<sub>53</sub>, L<sub>55</sub>, W<sub>58</sub> and SYT2-K<sub>60</sub>, I<sub>61</sub>, W<sub>66</sub> that were interacting initially with the Sia6 and  
214 Sia7 of GT1b in the preassembled SYT/GT1b complex, lose energy upon toxin binding (-92% and  
215 -47% respectively, Table S2, fig. S7), suggesting also a molecular rearrangement in this region.

216 *BoNT/B-GT1b and GD1a interactions*: In the minimized complexes, both the LBL and the beta  
217 hairpin loop K<sub>1113</sub>-P<sub>1117</sub> that interact with SYT, also bind to sialic acids of GT1b bound to SYT  
218 (Fig. 5, Table S1B, fig. S8B). The LBL binds to Sia 7 whereas the K<sub>1113</sub>-P<sub>1117</sub> loop binds to Sia 5  
219 and Sia 6 (Fig. 5). Remarkably, as shown in fig. S8B, the BoNT/B loop K<sub>1113</sub>-P<sub>1117</sub> corresponds to  
220 conserved β-hairpin loops E<sub>1114</sub>-V<sub>1117</sub>, A<sub>1126</sub>-R<sub>1129</sub> and K<sub>1143</sub>-D<sub>1147</sub> of BoNT/D, BoNT/C and tetanus  
221 toxin respectively which contribute to the sialic acid binding site (16) (12) (13) (30). Our model  
222 suggests that the BoNT/B-protein binding pocket has an evolutionarily conserved ability to bind  
223 sialic acids that are brought by the SYT-associated ganglioside in the case of BoNT/B. Concerning  
224 the canonical ganglioside binding site, the BoNT/B residues interacting with the sugar part of GD1a  
225 were globally conserved after minimization compared to structural data (Table S3).

226 Finally, it is worth noting that, in the minimized complex, cholesterol interacts with the TM domain  
227 of SYT, occupying a space created by the addition of the ceramide part of GD1a. Cholesterol  
228 increases the stability of the complex through a set of London forces with the ceramide part of  
229 GD1a and the TMD domain of SYT (Table S4). These data raise the interesting notion that  
230 cholesterol could play an active role in the initial steps of toxin binding to lipid rafts in agreement  
231 with a previous description of SYT/cholesterol interactions (17).

232 Altogether these results suggest that BoNT/B interacts with the JMD and TMD domains of SYT  
233 along with two ganglioside molecules, one associated with SYT and the other with the ganglioside  
234 binding pocket of the toxin, with interconnection of the different intramembrane domains.

235

### 236 **The lipid binding loop of BoNT/B binds to GT1b and SYT**

237 Our molecular modeling data suggest that the LBL could physically interact with SYT and GT1b.  
238 In order to corroborate the accuracy of these in silico predictions, we experimentally investigated

239 BoNT/B LBL binding to GT1b and SYT. We used the Langmuir monolayer method and recorded  
240 surface pressure changes in GT1b or SYT2-TM monolayers induced by a water-soluble BoNT/B  
241 peptide p1242-1256 encompassing the LBL (fig. S1). Injection of p1242-1256 underneath a  
242 monolayer of GT1b yielded an increase in surface pressure (Fig. 6A), whereas limited interaction  
243 was found with lyso-LacCer (a lipid with an inverted conic shape resembling gangliosides) or  
244 sphingomyelin (a major sphingolipid component of lipid rafts). The absence of interaction with the  
245 ceramide domain of sphingomyelin indicates that the LBL of BoNT/B interacts preferentially with  
246 the sugar part of GT1b.

247 In order to address the interaction of BoNT/B LBL with SYT, we used a SYT2 G<sub>40</sub>-S<sub>87</sub> peptide  
248 encompassing its JMD and TMD (fig. S1) that was spread at the air-water interface and incubated  
249 with p1242-1256 added in the aqueous subphase. As shown in Fig. 6B, the LBL strongly bound to  
250 the SYT2-TMD peptide but not to a monolayer of SYT2 with a farnesyl group (25) instead of the  
251 TMD domain (fig. S1), showing that this interaction was mainly driven by SYT2 TMD domain.  
252 Altogether, these experiments demonstrate that the LBL of BoNT/B directly binds to the sugar part  
253 of GT1b as well as to the TM of SYT.

254

### 255 **SYT1H<sub>51</sub>/K<sub>52</sub> and SYT2-N<sub>59</sub>/K<sub>60</sub> are key residues in BoNT/B binding**

256 We have previously shown that the mutation SYT1-K<sub>52</sub>A abolished BoNT/B binding to PC12  
257 neuroendocrine cells (25). Our present molecular modeling data predicts that, upon toxin binding,  
258 a molecular rearrangement occurs in the vicinity of SYT1-K<sub>52</sub> and the corresponding SYT2-K<sub>60</sub>.  
259 We thus investigated whether the SYT2-K<sub>60</sub> was also an important determinant in BoNT/B binding.  
260 Surface Plasmon Resonance analysis indicated that binding of the SYT2-G<sub>40</sub>-W<sub>66</sub> peptide to GT1b-  
261 containing liposomes was drastically inhibited by mutating K<sub>60</sub> to alanine (figs. S1 and S9),  
262 showing that SYT2-K<sub>60</sub> residue is involved in the SYT2/GT1b interaction like SYT1-K<sub>52</sub> (25).  
263 Immunofluorescence experiments showed that BoNT/B binding was severely impaired in PC12  
264 cells expressing SYT2-K<sub>60</sub>A, compared to cells expressing SYT2-WT, with a decrease of 64 %  
265 (fig. S10A, C). A similar degree of inhibition (69%) was obtained using HEK 293 cells (fig. S10B,  
266 D). Although this decrease is less than that observed for SYT1-K<sub>52</sub>A (25), these results indicate that  
267 the SYT2-K<sub>60</sub>A like SYT1-K<sub>52</sub>, is an important determinant in BoNT/B binding.

268 According to our model, SYT1-H<sub>51</sub> and SYT2-N<sub>59</sub> residues adjacent to SYT1-K<sub>52</sub> and SYT2-K<sub>60</sub>  
269 respectively, exhibit a high energy of interaction with BoNT/B (Fig. 3, fig. S6, Table S2). To  
270 ascertain the functional involvement of SYT1-H<sub>51</sub> in BoNT/B binding to SYT1, we mutated SYT1-  
271 H<sub>51</sub> to a glycine residue and measured by immunofluorescence BoNT/B binding to either WT or  
272 SYT1 mutant transfected HEK 293 cells. The mutation SYT1-H<sub>51</sub>G induced a significant reduction



273 (35%) in the binding of BoNT/B to the cell surface (IR BoNT/B of SYT1-WT:  $1.00 \pm 0.04$  vs. IR  
274 BoNT/B of SYT1-H<sub>51</sub>G:  $0.65 \pm 0.04$ ) while it did not affect expression levels of SYT1 (IR SYT of  
275 SYT1-WT:  $1.00 \pm 0.02$  vs. IR SYT of SYT1-H<sub>51</sub>G:  $1.01 \pm 0.02$ ) (Fig. 7A). Interestingly, a variant  
276 of SYT2-N<sub>59</sub> (SYT2-N<sub>59</sub>Q) occurs naturally in cats, which are known to be resistant to type B  
277 botulism (31), while expressing cleavable VAMP1, the predominant VAMP isoform in motor  
278 neurons (6) (Table S5). Of note, a Q residue at position 59 was present in all Felidae sequences  
279 analyzed (Table S5). Felidae are primarily or opportunistically scavengers, feeding on carrion, a  
280 major vector of botulism (32). Given the position of N<sub>59</sub> and its potential interactions with the toxin,  
281 N<sub>59</sub>Q substitution may induce steric hindrance impacting the binding of BoNT/B to SYT2. In order  
282 to address the accuracy of the present model and evaluate the potential impact on BoNT/B binding  
283 of this naturally occurring mutation, we transfected HEK 293 cells with either SYT2-WT or SYT2-  
284 N<sub>59</sub>Q and investigated by immunofluorescence BoNT/B binding in the presence of GT1b. As shown  
285 in Fig. 7, the N<sub>59</sub>Q mutation induced a 50% decrease in BoNT/B binding (IR BoNT/B of SYT2-  
286 WT:  $1.00 \pm 0.03$  vs. IR BoNT/B of SYT2-N<sub>59</sub>Q:  $0.52 \pm 0.02$ ), while the expression of SYT2  
287 remained unaffected (IR SYT of SYT2-WT:  $1.00 \pm 0.01$  vs. IR SYT of SYT2-N<sub>59</sub>Q:  $0.96 \pm 0.01$ ).  
288 Taken together, these results indicate that both SYT1-H<sub>51</sub>K<sub>52</sub> and SYT2-N<sub>59</sub>K<sub>60</sub> homologous  
289 residues constitute a crucial doublet for BoNT/B binding, and are consistent with the proposed  
290 structure of the SYT/GT1b/GD1a/cholesterol/BoNT-B complex. They also provide an evolutionary  
291 explanation for the appearance of mutations (SYT2-N<sub>59</sub>Q) in animals with a diet at least partially  
292 based on carrion.

## 293 294 **Discussion**

295 The current view of the BoNT/B binding determinants that anchor the distal tip of BoNT/B C-  
296 terminal domain to nerve terminals consists of two closed pockets interacting independently with  
297 SYT and gangliosides (GT1b or GD1a), and a lipid-binding loop thought to interact with the cell  
298 membrane via hydrophobic interactions. The central role of SYT in BoNT/B toxicity is supported  
299 by its relatively high affinity for the toxin, its synaptic localization conferring tissue specificity and  
300 by the observation that changes in potency among different BoNT/B isotypes are related to  
301 variability in the BoNT/B domain recognizing SYT but not in GBS1 (2) (33). Accordingly, the  
302 human SYT2-F<sub>54</sub>L variant shows a reduction in BoNT/B affinity and toxicity compared to mouse.  
303 In addition, a single or dual point mutation in the SYT binding pocket of recombinant BoNT/B  
304 increases its binding affinity to neuronal membrane and improves its clinical efficacy in a murine  
305 model (6).

306 Functional assays have unambiguously demonstrated that gangliosides are also necessary for  
307 BoNT/B intoxication and GT1b has a drastic synergistic effect on BoNT/B binding to SYT-  
308 containing membranes (25) (24) (27) (21). However, the contribution of GT1b to neuronal  
309 membrane recognition by BoNT/B, is not totally understood. The affinity of the toxin for GT1b  
310 reconstituted in nanodiscs is weak (30-50  $\mu$ M) (14) (15) and not sufficient to measure detectable  
311 BoNT/B binding and VAMP2 cleavage in SYT knockout hippocampal neurons (34). Yet, both the  
312 canonical ganglioside binding site GBS1 and the LBL appear to participate in GT1b potentiation  
313 of BoNT/B binding to SYT, as inactivation of the GBS1 or the LBL abolish the synergistic effect  
314 of GT1b in vitro and cause a strong reduction of toxicity (27) (15).

315 In a recent study we elucidated an important new mechanism underlying the role of gangliosides  
316 by demonstrating that GT1b actually binds to SYT JMD and induces the formation of an alpha-  
317 helix from an initially disordered domain (25). Intriguingly, GT1b overlaps critical residues defined  
318 by crystallographic and biochemical experiments in the SYT2-F<sub>54</sub>-I<sub>58</sub> region, raising the question  
319 whether and how BoNT/B recognizes a preassembled GT1b/SYT complex and whether this  
320 complex dissociates upon BoNT/B binding (25).

321 Several experimental methods have been used to analyze the synergetic effect of GT1b on BoNT/B  
322 binding to SYT, including cultured cells and reconstituted systems (proteoliposomes, ELISA,  
323 mixed detergent micelles) (25) (24) (27) (35). However, these approaches were not adapted to  
324 assessing whether during the GT1b potentiation effect, SYT is associated with GT1b. In the present  
325 study, we developed a SPR binding assay, with several GT1b molecules engaged in a complex with  
326 SYT, ensuring that BoNT/B could recognize SYT complexed to GT1b, along with free GT1b  
327 molecules that could also interact with the ganglioside-binding pocket of the toxin. This protocol  
328 revealed that a synergistic effect occurs when GT1b is bound to SYT, which is comparable to that  
329 observed when SYT is reconstituted in liposomes containing GT1b (25). Altogether, the SPR data  
330 strongly suggested that the SYT binding pocket of BoNT/B can accommodate SYT bound to GT1b.  
331 We then used molecular modeling to assess how BoNT/B could recognize the SYT/GT1b complex.  
332 We docked the SYT/GT1b complex into the BoNT/B SYT-binding pocket, based on the co-crystal  
333 coordinates of BoNT/B associated with GD1a, together with the membrane-embedded domains of  
334 SYT and gangliosides. Cholesterol, which is known to interact with both the TM of SYT and the  
335 ceramide moiety of gangliosides (36) was also included in the system. Docking simulations  
336 revealed that BoNT/B bound to GD1a can also interact with SYT1 or SYT2 bound to GT1b via the  
337 BoNT/B SYT-binding pocket described by structural data. The BoNT/B residues interacting either  
338 with SYT or GT1b are overall the same as described in the crystal structure, yet with additional  
339 interactions in the N-terminal domain of SYT. The SYT helix pre-conformed by GT1b extends

340 from E<sub>44</sub> to N<sub>59</sub> and the BoNT/B-SYT interaction is mainly driven by apolar residues, including  
341 SYT2-F<sub>47</sub>, F<sub>54</sub>, F<sub>55</sub> and I<sub>58</sub> as previously described (21) (20). The membrane constraints of our  
342 present model, introduce an angle between SYT and the membrane plane, modifying the interaction  
343 map between BoNT/B and the SYT helix in comparison to structural data obtained with only the  
344 extracellular domain of SYT (21) (20) (22). It is of note that GT1b rescue of BoNT/B binding to  
345 several SYT mutants have revealed the crucial role of SYT2-F<sub>54</sub> at the BoNT/B-SYT interface (21)  
346 (20) (37). Interestingly, our proposed models support this observation since they show that SYT2-  
347 F<sub>54</sub> and its counterpart SYT1-F<sub>46</sub> strongly interact with both GT1b and BoNT/B. Thus, molecular  
348 modeling, along with SPR binding experiments, are consistent with the view that the SYT/GT1b  
349 complex does not dissociate upon BoNT/B interaction and is recognized by the SYT binding  
350 pocket.

351 Our modeling and experimental data reveal that SYT2 (I<sub>58</sub>-W<sub>66</sub>) and SYT1 (L<sub>50</sub>-W<sub>58</sub>) regions, just  
352 upstream of the TMD of SYT, could play a pivotal role in the BoNT/B binding mechanism. The  
353 LBL binds to this region via several apolar residues and mutation of N<sub>59</sub> and K<sub>60</sub> in SYT2 (H<sub>51</sub> and  
354 K<sub>52</sub> in SYT1) inhibited binding of BoNT/B. Furthermore, several molecular rearrangements are  
355 predicted to occur in this domain namely for SYT1-K<sub>52</sub>-I<sub>53</sub> and SYT2-K<sub>60</sub>-I<sub>61</sub> which tend to lose  
356 interaction energy with GT1b for the benefit of BoNT/B.

357 During the minimization process the BoNT/B LBL moves toward SYT/GT1b so that it finally  
358 interacts with sialic acids of GT1b, the extracellular C-terminal part of the SYT JMD as well as  
359 membrane-embedded SYT residues. This movement of the LBL is allowed by the initial interaction  
360 with the preformed SYT/GT1b complex which determines the orientation of BoNT/B so that the  
361 LBL is directed toward the glycone part of GT1b and the TM domain of SYT. Consistent with our  
362 model, we determined experimentally that the binding of the LBL to SYT requires the presence of  
363 its TM domain. The LBL binding to SYT TM agrees with observations that a BoNT/B mutant with  
364 LBL deletion still recognizes the extracellular SYT2 domain, but displays drastically decreased  
365 binding to SYT2 with TMD, whether in the absence or presence of ganglioside (15). We also find  
366 that LBL directly binds to a monolayer of GT1b, but does not recognize sphingomyelin. This  
367 suggests that the LBL preferentially recognizes the polar headgroup of GT1b. The demonstration  
368 of a direct interaction between LBL and GT1b corroborates a report that LBL deletion decreased  
369 BoNT/B binding to nanodiscs containing GT1b (15). From a structural point of view, our findings  
370 suggest that BoNT/B LBL reinforces the interaction of BoNT/B with the SYT/GT1b receptor,  
371 explaining why its deletion dramatically reduces BoNT/B toxicity (15). Interestingly, BoNT/C,  
372 BoNT/D and tetanus toxin, also possess a lipid-binding loop that has been shown to bind sialic  
373 acids and it has been reported that the BoNT/C and BoNT/D LBL are structurally close to the

374 corresponding SYT-binding site of BoNT/B (13) (30) (12) (38). We propose that, for BoNT/B, C,  
375 D and tetanus toxin, a functional relationship exists between the presence of an LBL and the ability  
376 of these toxins to bind free or SYT-associated sialic acids outside of GBS1. As BoNT/G has a  
377 similar SYT-binding site to BoNT/B and an LBL, it would be interesting to investigate if this toxin  
378 also interacts with a SYT/GT1b complex (37). For BoNT/A and BoNT/E, the absence of LBL  
379 would be compensated by an interaction with glycosides covalently linked to their receptor, SV2  
380 in this case (1).

381 In addition to the LBL, the model predicts that BoNT/B loop 1113-1117 also interacts with sialic  
382 acids of the GT1b-SYT complex. Interestingly and independently from GBS1, tetanus toxin,  
383 BoNT/C and BoNT/D use residues with a similar 3D-position to the BoNT/B 1113-1117 loop to  
384 mediate binding to sialic acids. As co-crystallization studies failed to detect the presence of  
385 sialyllactose in the BoNT/B SYT binding pocket (39), our model suggests that BoNT/B can bind  
386 sialic acid only when the glycoside is presented by SYT. The fact that BoNT/B could bind another  
387 ganglioside, in addition to that occupying GBS1, is compatible with the observation that trefoil  
388 recognition of carbohydrates is often multivalent (40). It has been noted that BoNT/B binds SYT  
389 using a pocket that is homologous to the sia-binding site of BoNT/C, BoNT/D and tetanus toxin  
390 (12), consistent with the view that the so-called sialic acid site of other BoNTs and the SYT binding  
391 site of BoNT/B may have a structurally related conserved function (12). Our model indicates that  
392 this pocket has conserved its ability to bind sialic acid associated with SYT in the case of BoNT/B.  
393 Thus, instead of the predominant view that BoNTs independently recognize a protein and a  
394 ganglioside or two gangliosides (BoNT/C) using two distinct pockets, our data support a new  
395 scenario in which a BoNT protein-binding pocket accepts a preformed protein/ganglioside  
396 complex. To our knowledge, this is the first description of recognition by a toxin of a  
397 protein/ganglioside complex.

398 Our model significantly extends our understanding of the BoNT/B-SYT binding interface and  
399 uncovers additional interacting residues in SYT. Among them SYT2-N<sub>59</sub> and its SYT1-H<sub>51</sub>  
400 counterpart were predicted to engage strong interactions with BoNT/B in particular with E<sub>1191</sub>, a  
401 key residue that modulates engineered BoNT/B activity for therapeutic purpose. This important  
402 feature was confirmed by mutagenesis and evaluation of BoNT/B binding to SYT-expressing cell  
403 cultures. It is interesting to note that the SYT2-N<sub>59</sub>Q mutation is associated with a decrease of  
404 BoNT/B binding. The presence of a glutamine at this position corresponds to a natural  
405 polymorphism in Felidae. Certain animals are resistant to botulism (41) (31) and to our knowledge  
406 type B botulism has never been reported in the Felidae. Taken together, our data may suggest that

407 this natural variant could confer partial protection against type B botulism in animals feeding on  
408 carrion which can contain high amounts of BoNTs (32).

409 Our current findings thus highlight a new role for GT1b in BoNT/B binding by its direct interaction  
410 with SYT, explaining the poor affinity of BoNT/B for GT1b alone, but potentially enhancing binding  
411 in the presence of SYT, particularly for SYT1. The very low affinity of BoNT/B for SYT1 has been  
412 suggested to be partially due to a steric clash with the toxin, involving SYT1-L<sub>50</sub> (21) (42). BoNT/B  
413 has been estimated to have at least 100-fold less affinity for SYT1 than SYT2 while GT1b reduces  
414 this difference 10-fold (20) (25). Our present model predicts that SYT1-L<sub>50</sub> binds GT1b and  
415 therefore a preassembled SYT/GT1b complex may facilitate BoNT/B binding to SYT1. Moreover  
416 our results are consistent with the fact that competitive neutralization of BoNT/B toxicity requires  
417 a SYT/ganglioside mixture rather SYT alone (26).

418 Our data revisit the dual receptor model (43) by uncovering an additional role for GT1b. We  
419 propose a new model in which, after the toxin is attracted and concentrated on the membrane by  
420 the negative charges of GT1b in lipid rafts (44), a preassembled and structured SYT/GT1b complex  
421 is accommodated in the SYT-binding pocket of BoNT/B, concomitantly to the binding of a  
422 ganglioside in the conserved ganglioside binding site GBS1. The LBL would then reinforce  
423 BoNT/B binding by interacting with SYT TMD and its preassembled GT1b. Accordingly,  
424 mutations in the GBS1, lipid binding loop or perturbation of GT1b/SYT interaction result in a loss  
425 of BoNT/B affinity and toxicity (25) (15) (27). After internalization, GT1b would participate in the  
426 toxin translocation process (45).

427 The organization of SYT/GT1b and GD1a receptors in the model with connected intramembrane  
428 domains, mimics chalice-shaped dimers reported for alpha synuclein and beta amyloid peptide,  
429 which are also chaperoned by the head groups of gangliosides in cholesterol enriched membrane  
430 domains (46) (47) (48). As synaptic vesicles are highly enriched in cholesterol, it is probable that  
431 pre-assembled SYT/cholesterol complexes are translocated to the plasma membrane and are then  
432 integrated in a raft region where it can interact with GT1b and other polysialogangliosides. It has  
433 been suggested that simultaneous binding to SYT and gangliosides could impose a limited degree  
434 of freedom on BoNT/B orientation with respect to the membrane surface (20) (49). In line with this  
435 notion, our data suggest that the intramembrane interactions between SYT and gangliosides could  
436 indeed immobilize both co-receptors at an appropriate distance, optimizing binding.

437 In summary, we present here a model of BoNT/B binding to neuronal membranes, that takes into  
438 account the specific topology of membrane receptors. BoNT/B has been successfully engineered to  
439 increase its affinity in a preclinical model (6). Our present findings could provide insights into the

440 rational design of recombinant BoNTs for medical applications and for the development of  
441 inhibitors (50) (51) (14).

442

## 443 **Materials and Methods**

444

### 445 **Experimental design**

446 The main objective of this study was to investigate how botulinum neurotoxin serotype B binds to  
447 its receptors in a membrane context, since the available structural data were obtained in the absence  
448 of apolar domains. We developed an SPR (Surface Plasmon Resonance) experimental configuration  
449 to ensure that the synaptotagmin domain that interacts with BoNT/B was bound to GT1b, before  
450 characterizing the interaction of BoNT/B with this preassembled complex. Molecular modeling was  
451 performed to model BoNT/B in interaction with the preassembled SYT1/GT1b and SYT2/GT1b  
452 complexes docked to the synaptotagmin binding pocket. For this purpose, we used the structural  
453 coordinates stored in the PDB files 6G5K, 4KBB and 2NP0 to generate a complete model of  
454 BoNT/B-SYT1/2-gangliosides and cholesterol. We compared the interaction energies and  
455 landscapes of all components of the complexes with previous structural data. Newly identified  
456 contact points were compared with published reports and the importance of new synaptotagmin-  
457 contact points were experimentally validated in heterologous expression systems.

458

### 459 **Reagents**

460 BoNT/B (B1 Okra strain) was obtained as described (25). All peptides were synthesized by  
461 Genecust, except for farnesylated pSYT2 (25). DMPC (1,2-Dimyristoyl-sn-glycero-3-  
462 phosphocholine) was from Avanti Polar Lipids. GT1b was from Matreya LLC. Polyclonal anti-  
463 SYT1 31-55 region antibodies were generously provided by M. Takahashi. Rabbit anti-SYT2 40-  
464 65 polyclonal antibodies were produced by Genecust using a synthetic peptide (rat SYT2 40-65)  
465 and purified using protein-A sepharose. All experiments were performed in accordance with French  
466 and European guidelines for handling botulinum neurotoxin. GT1b, lyso-lactosylceramide and  
467 sphingomyelin were from Matreya LLC. Anti-BoNT/B and anti-SYT1/2 (1D12) antibodies were  
468 obtained as described (25). Alexa-coupled secondary antibodies were from Jackson  
469 Immunoresearch. DAPI was from SIGMA-Aldrich. Anti-GT1b monoclonal antibodies were from  
470 Merck Millipore (MAB 5608).

471

### 472 **SPR experiments**

473 SPR measurements were performed with a Biacore T200 apparatus (Cytiva) using HBS (10 mM  
474 HEPES/NaOH pH 7.4, 150 mM NaCl) or TBS (10 mM TRIS/NaOH pH 7.4, 150 mM NaCl) as  
475 running buffer. CMDP chips (Xantec Bioanalytics, Germany) were functionalized with neutravidin  
476 (Pierce) according to standard protocols. pSYT peptides were injected onto neutravidin to reach  
477 between 250-500 RU, depending on the experiment. GT1b (2 mg/ml in methanol) was diluted  
478 extemporaneously in running buffer and injected onto pSYT sensorchips at flow rates from 5 to 40  
479  $\mu$ l/min, depending on experiments. Gangliosides were stripped from pSYT using TBS containing  
480 CHAPS 1% (8 s at 40  $\mu$ l/min). The binding stoichiometry of GT1b/pSYT was calculated using the  
481  $RU_{max}$  value, determined experimentally by saturating pSYT with GT1b diluted under the CMC  
482 (10  $\mu$ M) (28). Stoichiometry =  $RU_{max} \times MW \text{ of GT1b} / RU \text{ pSYT} \times MW \text{ of pSYT}$ . BoNT/B was  
483 injected at 30 nM at a flow rate of 5  $\mu$ l/min. For GT1b potentiation of BoNT/B binding to pSYT1,  
484 GT1b was not stripped and accumulated on pSYT1 after each BoNT/B injection. Anti-GT1b  
485 antibodies (ascite, dilution x 1000) were injected for 2 min at 10  $\mu$ l/min over pSYT1 and  
486 pSYT1/GT1b complex (250 RU pSYT1  $\pm$  GT1b (30-100 RU)), before and after BoNT/B  
487 interaction (20 nM for 3 min). Unless stated, non-specific signals on control flow cells (immobilized  
488 pSYT9 or activated / deactivated empty flow cell) were automatically subtracted from  
489 measurements on experimental flow cells. Measurement of pSYT2 peptide binding to GT1b-  
490 containing liposomes was performed using hydrophobic L1 sensor chips as described (25).  
491 Liposomes containing 100 % DMPC (control flow cell) or 92 % DMPC, 8% GT1b (experimental  
492 flow cell) were immobilized and SYT2 peptides binding measured 5 s before the end of the  
493 injection.

#### 494

#### 495 **Langmuir monolayers experiments**

496 Surface pressure measurements revealing peptide-lipid and peptide-peptide interactions at the air-  
497 water interface were studied by the Langmuir film balance technique with a fully automated  
498 microtensiometer ( $\mu$ TROUGH SX, Kibron Inc. Helsinki, Finland) as described previously (52) (53)  
499 (25).

#### 500

#### 501 **Immunofluorescence**

502 HEK293 or PC12 cells, were cultured on poly-L-Lysine (10  $\mu$ g/ml) treated coverslips (300,000  
503 cells per well) in DMEM containing 5% FBS, 5% HS and 1% penicillin/streptomycin mixture  
504 (complete medium). Cells were transfected with the corresponding plasmids (pIRES-EGFP-SYT2;  
505 pIRES-EGFP-K<sub>60</sub>A-SYT2; pIRES-EGFP-N<sub>59</sub>Q-SYT2; pIRES-EGFP-SYT1 or pIRES-EGFP-  
506 H<sub>51</sub>G-SYT1) using Lipofectamine 2000 and according to the manufacturer's procedure. 40 hours

507 after transfection, GT1b (10  $\mu\text{g/ml}$ ) was added to the wells in DMEM and incubated for 1.5 h at  
508 37°C followed by one washing step and transfer to complete medium. BoNT/B (10 nM and 1 nM  
509 for SYT1 and SYT2 conditions respectively) was added afterwards and incubated for 30-45 min at  
510 37°C. After a first wash with the culture medium, additional washes were performed with PBS and  
511 cells were fixed in the dark at 4°C in 4% paraformaldehyde/PBS for 15 min followed by  $\text{NH}_4\text{Cl}$   
512 washing steps. Non-specific binding was blocked with 0.2% (w/v) gelatine or 5% (v/v) goat serum  
513 in a PBS buffer containing 0.1% saponin. Anti-BoNT/B (0.5  $\mu\text{g}/\mu\text{l}$ ), and 1D12 anti-SYT (1  $\mu\text{g/ml}$ )  
514 antibodies were then added for 45 min at 22°C. After subsequent washing, staining was visualized  
515 using secondary anti-rabbit Alexa-594 and anti-mouse Alexa-488 antibodies. Nuclei were detected  
516 using DAPI.

517

### 518 **Image acquisition and analysis**

519 Confocal images were acquired on a Zeiss LSM780 microscope and processed using ImageJ  
520 (<http://rsb.info.nih.gov/ij/>). For quantification, SYT immunolabeling images were thresholded in  
521 order to get a binary mask. This binary mask was used to obtain immunoreactivity (IR) values of  
522 the regions of interest (ROIs) over SYT and BoNT/B channels. For comparisons of BoNT/B  
523 binding to WT vs mutant SYTs, IR values were normalized to WT in every experiment. Results are  
524 presented as mean  $\pm$  SEM. Statistical analysis was performed using Mann-Whitney U test.

525

### 526 **Molecular modelling**

527 Molecular modelling studies were performed using Hyperchem (<http://www.hyper.com>), Deep  
528 View/Swiss-Pdb viewer (<https://spdbv.vital-it.ch>) and Molegro Molecular viewer  
529 (<http://molexus.io/molegro-molecular-viewer>) as described in previous studies (25) (54). The  
530 coordinates of the BoNT/B Lipid binding loop (aa 1245-1252) present in PDB 2NM1 were inserted  
531 in PDBs files 4KBB and 6G5K. The sugar coordinates of GD1a were then merged with the PDB  
532 file 6G5K to reconstitute a trimolecular complex for SYT1. The preassembled complex  
533 GT1b/SYT1 and GT1b/SYT2 were docked on the synaptotagmin binding pocket according to the  
534 crystal coordinates of SYT1 (PDB 6G5K) and SYT2 (PDB 4KBB). The structures of the ceramide  
535 part of GD1a and cholesterol were retrieved from the platform Charmm-GUI and added to the  
536 models to obtain a full system in a membrane context. Energy minimization was performed with  
537 the Polak-Ribière conjugate gradient algorithm, with the Bio+(CHARMM) force field in  
538 Hyperchem, typically with  $3 \times 10^5$  steps, and a root-mean-square (RMS) gradient of 0.01 kcal.  
539  $\text{\AA}^{-1} \cdot \text{mol}^{-1}$  as the convergence condition.



540 In order to generate a schematic representation of the membrane-embedded protein complexes, we  
541 used CHARM-GUI membrane builder (55) by inserting protein complexes previously oriented in  
542 the PPM Web Server (56). The protein complex was embedded in a 128-DPPC (1,2-  
543 Dipalmitoylphosphatidylcholine) molecule bilayer. For visual clarity, and since the membrane-  
544 embedded protein complexes were not used for any further calculations, some of the DPPC  
545 molecules around the protein complexes were manually erased in order to have a better perspective  
546 of the regions of interest in the BoNT/B-synaptotagmin complexes. In fig. S4A, only the phosphate  
547 groups of the DPPCs were depicted so as to have a visual reference of the membrane plane. Figures  
548 of the protein complexes inserted in the membrane systems were generated using Chimera software  
549 (57).

550

### 551 **Statistical analysis**

552 Results are presented as mean  $\pm$  SEM of n independent experiments. Statistical analysis was  
553 performed using either Mann-Whitney U test or One-way ANOVA followed by Bonferroni post-  
554 hoc test for means comparisons. All statistical tests were performed using OriginPro 8.0.

555

556

### 557 **References**

- 558 1. B. Poulain, E. Lemichez, M. R. Popoff, Neuronal selectivity of botulinum neurotoxins.  
559 *Toxicon* **178**, 20-32 (2020).
- 560 2. M. Dong, G. Masuyer, P. Stenmark, Botulinum and Tetanus Neurotoxins. *Annu Rev*  
561 *Biochem* **88**, 811-837 (2019).
- 562 3. J. R. Davies, S. M. Liu, K. R. Acharya, Variations in the Botulinum Neurotoxin Binding  
563 Domain and the Potential for Novel Therapeutics. *Toxins (Basel)* **10**, (2018).
- 564 4. S. Pellett, T. L. Yaksh, R. Ramachandran, Current status and future directions of botulinum  
565 neurotoxins for targeting pain processing. *Toxins (Basel)* **7**, 4519-4563 (2015).
- 566 5. M. Pirazzini, O. Rossetto, R. Eleopra, C. Montecucco, Botulinum Neurotoxins: Biology,  
567 Pharmacology, and Toxicology. *Pharmacol Rev* **69**, 200-235 (2017).
- 568 6. M. Elliott, C. Favre-Guilmard, S. M. Liu, J. Maignel, G. Masuyer, M. Beard, C. Boone, D.  
569 Carre, M. Kalinichev, S. Lezmi, I. Mir, C. Nicoleau, S. Palan, C. Perier, E. Raban, S. Zhang,  
570 M. Dong, P. Stenmark, J. Krupp, Engineered botulinum neurotoxin B with improved  
571 binding to human receptors has enhanced efficacy in preclinical models. *Sci Adv* **5**,  
572 eaau7196 (2019).
- 573 7. R. L. Schnaar, Gangliosides of the Vertebrate Nervous System. *Journal of Molecular*  
574 *Biology* **428**, 3325-3336 (2016).
- 575 8. S. Sipione, J. Monyor, D. Galleguillos, N. Steinberg, V. Kadam, Gangliosides in the Brain:  
576 Physiology, Pathophysiology and Therapeutic Applications. *Front Neurosci* **14**, 572965  
577 (2020).
- 578 9. M. Zuverink, J. T. Barbieri, Protein Toxins That Utilize Gangliosides as Host Receptors.  
579 *Prog Mol Biol Transl Sci* **156**, 325-354 (2018).
- 580 10. J. Fantini, N. Yahia, Eds., *Brain Lipids in Synaptic Function and Neurological Disease :  
581 Clues to Innovative Therapeutic Strategies for Brain Disorders*, (Elsevier Academic Press,  
582 New-York 2015), vol. 2015, pp. 398.

- 583 11. J. Fantini, H. Chahinian, N. Yahi, Synergistic antiviral effect of hydroxychloroquine and  
584 azithromycin in combination against SARS-CoV-2: What molecular dynamics studies of  
585 virus-host interactions reveal. *Int J Antimicrob Agents* **56**, 106020 (2020).
- 586 12. A. P. Karalewitz, Z. Fu, M. R. Baldwin, J. J. Kim, J. T. Barbieri, Botulinum neurotoxin  
587 serotype C associates with dual ganglioside receptors to facilitate cell entry. *J Biol Chem*  
588 **287**, 40806-40816 (2012).
- 589 13. J. Strotmeier, K. Lee, A. K. Volker, S. Mahrhold, Y. Zong, J. Zeiser, J. Zhou, A. Pich, H.  
590 Bigalke, T. Binz, A. Rummel, R. Jin, Botulinum neurotoxin serotype D attacks neurons via  
591 two carbohydrate-binding sites in a ganglioside-dependent manner. *Biochem J* **431**, 207-  
592 216 (2010).
- 593 14. L. Yin, G. Masuyer, S. Zhang, J. Zhang, S. I. Miyashita, D. Burgin, L. Lovelock, S. F.  
594 Coker, T. M. Fu, P. Stenmark, M. Dong, Characterization of a membrane binding loop leads  
595 to engineering botulinum neurotoxin B with improved therapeutic efficacy. *PLoS Biol* **18**,  
596 e3000618 (2020).
- 597 15. D. Stern, J. Weisemann, A. Le Blanc, L. von Berg, S. Mahrhold, J. Piesker, M. Laue, P. B.  
598 Lupp, M. B. Dorner, B. G. Dorner, A. Rummel, A lipid-binding loop of botulinum  
599 neurotoxin serotypes B, DC and G is an essential feature to confer their exquisite potency.  
600 *PLoS Pathog* **14**, e1007048 (2018).
- 601 16. C. Chen, M. R. Baldwin, J. T. Barbieri, Molecular basis for tetanus toxin coreceptor  
602 interactions. *Biochemistry* **47**, 7179-7186 (2008).
- 603 17. C. Thiele, M. J. Hannah, F. Fahrenholz, W. B. Huttner, Cholesterol binds to synaptophysin  
604 and is required for biogenesis of synaptic vesicles. *Nat Cell Biol* **2**, 42-49 (2000).
- 605 18. Y. Park, J. B. Seo, A. Fraind, A. Perez-Lara, H. Yavuz, K. Han, S. R. Jung, I. Kattan, P. J.  
606 Walla, M. Choi, D. S. Cafiso, D. S. Koh, R. Jahn, Synaptotagmin-1 binds to PIP(2)-  
607 containing membrane but not to SNAREs at physiological ionic strength. *Nat Struct Mol*  
608 *Biol* **22**, 815-823 (2015).
- 609 19. J. Yao, S. E. Kwon, J. D. Gaffaney, F. M. Dunning, E. R. Chapman, Uncoupling the roles  
610 of synaptotagmin I during endo- and exocytosis of synaptic vesicles. *Nat Neurosci* **15**, 243-  
611 249 (2011).
- 612 20. R. Jin, A. Rummel, T. Binz, A. T. Brunger, Botulinum neurotoxin B recognizes its protein  
613 receptor with high affinity and specificity. *Nature* **444**, 1092-1095 (2006).
- 614 21. Q. Chai, J. W. Arndt, M. Dong, W. H. Tepp, E. A. Johnson, E. R. Chapman, R. C. Stevens,  
615 Structural basis of cell surface receptor recognition by botulinum neurotoxin B. *Nature* **444**,  
616 1096-1100 (2006).
- 617 22. R. P. Berntsson, L. Peng, M. Dong, P. Stenmark, Structure of dual receptor binding to  
618 botulinum neurotoxin B. *Nat Commun* **4**, 2058 (2013).
- 619 23. R. Desplantes, C. Leveque, B. Muller, M. Lotierzo, G. Ferracci, M. Popoff, M. Seagar, R.  
620 Mamoun, O. El Far, Affinity biosensors using recombinant native membrane proteins  
621 displayed on exosomes: application to botulinum neurotoxin B receptor. *Sci Rep* **7**, 1032  
622 (2017).
- 623 24. S. Kozaki, Y. Kamata, S. Watarai, T. Nishiki, S. Mochida, Ganglioside GT1b as a  
624 complementary receptor component for Clostridium botulinum neurotoxins. *Microb Pathog*  
625 **25**, 91-99 (1998).
- 626 25. A. Flores, J. Ramirez-Franco, R. Desplantes, K. Debreux, G. Ferracci, F. Wernert, M. P.  
627 Blanchard, Y. Maulet, F. Youssouf, M. Sangiardi, C. Iborra, M. R. Popoff, M. Seagar, J.  
628 Fantini, C. Leveque, O. El Far, Gangliosides interact with synaptotagmin to form the high-  
629 affinity receptor complex for botulinum neurotoxin B. *Proc Natl Acad Sci U S A* **116**, 18098-  
630 18108 (2019).

- 631 26. M. Dong, D. A. Richards, M. C. Goodnough, W. H. Tepp, E. A. Johnson, E. R. Chapman,  
632 Synaptotagmins I and II mediate entry of botulinum neurotoxin B into cells. *J Cell Biol* **162**,  
633 1293-1303 (2003).
- 634 27. A. Rummel, T. Eichner, T. Weil, T. Karnath, A. Gutcaits, S. Mahrhold, K. Sandhoff, R. L.  
635 Proia, K. R. Acharya, H. Bigalke, T. Binz, Identification of the protein receptor binding site  
636 of botulinum neurotoxins B and G proves the double-receptor concept. *Proc Natl Acad Sci*  
637 *U S A* **104**, 359-364 (2007).
- 638 28. B. Ulrich-Bott, H. Wiegandt, Micellar properties of glycosphingolipids in aqueous media.  
639 *J Lipid Res* **25**, 1233-1245 (1984).
- 640 29. J. Fantini, N. Garmy, R. Mahfoud, N. Yahi, Lipid rafts: structure, function and role in HIV,  
641 Alzheimer's and prion diseases. *Expert Rev Mol Med* **4**, 1-22 (2002).
- 642 30. J. Strotmeier, S. Gu, S. Jutzi, S. Mahrhold, J. Zhou, A. Pich, T. Eichner, H. Bigalke, A.  
643 Rummel, R. Jin, T. Binz, The biological activity of botulinum neurotoxin type C is  
644 dependent upon novel types of ganglioside binding sites. *Mol Microbiol* **81**, 143-156 (2011).
- 645 31. C. Montecucco, M. B. Rasotto, On botulinum neurotoxin variability. *MBio* **6**, (2015).
- 646 32. N. E. Ortiz, G. R. Smith, The production of Clostridium botulinum type A, B and D toxin  
647 in rotting carcasses. *Epidemiol Infect* **113**, 335-343 (1994).
- 648 33. J. R. Davies, G. Masuyer, P. Stenmark, Structural and Biochemical Characterization of  
649 Botulinum Neurotoxin Subtype B2 Binding to Its Receptors. *Toxins (Basel)* **12**, (2020).
- 650 34. M. Dong, W. H. Tepp, H. Liu, E. A. Johnson, E. R. Chapman, Mechanism of botulinum  
651 neurotoxin B and G entry into hippocampal neurons. *J Cell Biol* **179**, 1511-1522 (2007).
- 652 35. E. Wild, U. Bonifas, J. Klimek, J. H. Troschmeier, B. Kramer, B. Kegel, H. A. Behrens-  
653 Nicol, In vitro potency determination of botulinum neurotoxin B based on its receptor-  
654 binding and proteolytic characteristics. *Toxicol In Vitro* **34**, 97-104 (2016).
- 655 36. J. Fantini, C. Di Scala, C. J. Baier, F. J. Barrantes, Molecular mechanisms of protein-  
656 cholesterol interactions in plasma membranes: Functional distinction between topological  
657 (tilted) and consensus (CARC/CRAC) domains. *Chem Phys Lipids* **199**, 52-60 (2016).
- 658 37. P. Stenmark, M. Dong, J. Dupuy, E. R. Chapman, R. C. Stevens, Crystal structure of the  
659 botulinum neurotoxin type G binding domain: insight into cell surface binding. *Journal of*  
660 *Molecular Biology* **397**, 1287-1297 (2010).
- 661 38. P. Emsley, C. Fotinou, I. Black, N. F. Fairweather, I. G. Charles, C. Watts, E. Hewitt, N.  
662 W. Isaacs, The structures of the H(C) fragment of tetanus toxin with carbohydrate subunit  
663 complexes provide insight into ganglioside binding. *J Biol Chem* **275**, 8889-8894 (2000).
- 664 39. S. Swaminathan, S. Eswaramoorthy, Structural analysis of the catalytic and binding sites of  
665 Clostridium botulinum neurotoxin B. *nature structural biology* **7**, 693-699 (2000).
- 666 40. A. P. Karalewitz, A. R. Kroken, Z. Fu, M. R. Baldwin, J. J. Kim, J. T. Barbieri, Identification  
667 of a unique ganglioside binding loop within botulinum neurotoxins C and D-SA.  
668 *Biochemistry* **49**, 8117-8126 (2010).
- 669 41. E. van Ermengem, Classics in infectious diseases. A new anaerobic bacillus and its relation  
670 to botulism. E. van Ermengem. Originally published as "Ueber einen neuen anaeroben  
671 Bacillus und seine Beziehungen zum Botulismus" in Zeitschrift fur Hygiene und  
672 Infektionskrankheiten 26: 1-56, 1897. *Rev Infect Dis* **1**, 701-719 (1979).
- 673 42. K. H. Lam, G. Yao, R. Jin, Diverse binding modes, same goal: The receptor recognition  
674 mechanism of botulinum neurotoxin. *Prog Biophys Mol Biol* **117**, 225-231 (2015).
- 675 43. C. Montecucco, How do tetanus and botulinum toxins bind to neuronal membranes? *Trends*  
676 *Biochem Sci* **11**, 314-317 (1986).
- 677 44. F. Fogolari, S. C. Tosatto, L. Muraro, C. Montecucco, Electric dipole reorientation in the  
678 interaction of botulinum neurotoxins with neuronal membranes. *FEBS Lett* **583**, 2321-2325  
679 (2009).

- 680 45. S. Sun, S. Suresh, H. Liu, W. H. Tepp, E. A. Johnson, J. M. Edwardson, E. R. Chapman,  
681 Receptor binding enables botulinum neurotoxin B to sense low pH for translocation channel  
682 assembly. *Cell Host Microbe* **10**, 237-247 (2011).
- 683 46. J. Fantini, N. Yahi, N. Garmy, Cholesterol accelerates the binding of Alzheimer's beta-  
684 amyloid peptide to ganglioside GM1 through a universal hydrogen-bond-dependent sterol  
685 tuning of glycolipid conformation. *Front Physiol* **4**, 120 (2013).
- 686 47. J. Fantini, H. Chahinian, N. Yahi, Progress toward Alzheimer's disease treatment:  
687 Leveraging the Achilles' heel of Aβ oligomers? *Protein Sci* **29**, 1748-1759 (2020).
- 688 48. N. Yahi, C. Di Scala, H. Chahinian, J. Fantini, Innovative treatment targeting gangliosides  
689 aimed at blocking the formation of neurotoxic alpha-synuclein oligomers in Parkinson's  
690 disease. *Glycoconj J*, (2021).
- 691 49. R. M. Benoit, D. Frey, M. Hilbert, J. T. Kevenaar, M. M. Wieser, C. U. Stirnimann, D.  
692 McMillan, T. Ceska, F. Lebon, R. Jaussi, M. O. Steinmetz, G. F. Schertler, C. C.  
693 Hoogenraad, G. Capitani, R. A. Kammerer, Structural basis for recognition of synaptic  
694 vesicle protein 2C by botulinum neurotoxin A. *Nature* **505**, 108-111 (2014).
- 695 50. C. Rasetti-Escargueil, M. R. Popoff, Engineering Botulinum Neurotoxins for Enhanced  
696 Therapeutic Applications and Vaccine Development. *Toxins (Basel)* **13**, (2020).
- 697 51. E. Fonfria, M. Elliott, M. Beard, J. A. Chaddock, J. Krupp, Engineering Botulinum Toxins  
698 to Improve and Expand Targeting and SNARE Cleavage Activity. *Toxins (Basel)* **10**,  
699 (2018).
- 700 52. J. Fantini, N. Garmy, N. Yahi, Prediction of glycolipid-binding domains from the amino  
701 acid sequence of lipid raft-associated proteins: application to HpaA, a protein involved in  
702 the adhesion of *Helicobacter pylori* to gastrointestinal cells. *Biochemistry* **45**, 10957-10962  
703 (2006).
- 704 53. C. Di Scala, J. D. Troadec, C. Lelievre, N. Garmy, J. Fantini, H. Chahinian, Mechanism of  
705 cholesterol-assisted oligomeric channel formation by a short Alzheimer beta-amyloid  
706 peptide. *J Neurochem* **128**, 186-195 (2014).
- 707 54. J. Fantini, N. Yahi, F. Azzaz, H. Chahinian, Structural dynamics of SARS-CoV-2 variants:  
708 A health monitoring strategy for anticipating Covid-19 outbreaks. *J Infect* **83**, 197-206  
709 (2021).
- 710 55. E. L. Wu, X. Cheng, S. Jo, H. Rui, K. C. Song, E. M. Davila-Contreras, Y. Qi, J. Lee, V.  
711 Monje-Galvan, R. M. Venable, J. B. Klauda, W. Im, CHARMM-GUI Membrane Builder  
712 toward realistic biological membrane simulations. *J Comput Chem* **35**, 1997-2004 (2014).
- 713 56. M. A. Lomize, I. D. Pogozheva, H. Joo, H. I. Mosberg, A. L. Lomize, OPM database and  
714 PPM web server: resources for positioning of proteins in membranes. *Nucleic Acids Res* **40**,  
715 D370-376 (2012).
- 716 57. E. F. Pettersen, T. D. Goddard, C. C. Huang, G. S. Couch, D. M. Greenblatt, E. C. Meng,  
717 T. E. Ferrin, UCSF Chimera--a visualization system for exploratory research and analysis.  
718 *J Comput Chem* **25**, 1605-1612 (2004).
- 719  
720  
721  
722

## 723 Acknowledgments

724 We thank Raymond Miquelis for constructive discussions.

725

## 726 Funding:

727 Institut National de la Santé et de la Recherche Médicale (INSERM)

728 Aix-Marseille Université (AMU)

729 Agence Nationale de la Recherche (ANR) (grant ANR-17-CE16-0022) for the postdoctoral  
730 financial support of JRF

731 Ministère des Armées (AID) and Aix-Marseille Université AMU for the PhD thesis of FO

732

733

734 **Author contributions:** CL, OEF and MSeagar conceived the study. CL and OEF  
735 supervised the entire project, the experimental design, data interpretation and manuscript  
736 preparation. CL and OEF analysed and interpreted the data. JRF and CL performed  
737 immunofluorescence experiments, JRF acquired the corresponding images and performed  
738 treatment and analysis. FA performed molecular modelling and prepared with JRF  
739 molecular modelling figures. CL and GF performed SPR experiments. JF performed  
740 Langmuir monolayer experiments. YF and MSangiardi performed expression plasmids  
741 preparation and preliminary expression tests. CL performed SPR experiments. CL wrote  
742 the original draft of the manuscript. CL, FA, JF, OEF and JRF prepared the figures. MRP  
743 was involved in discussion and data analysis. All authors edited and reviewed the  
744 manuscript.

745

746

747 **Competing interests:** The authors declare that they have no competing interests.

748

749 **Data and materials availability:** All data needed to evaluate the conclusions in the paper  
750 are present in the paper and/or the Supplementary Materials.

751

752

753

754

755

756

757

758

759

760

761

762

763

764

765

766

767

768

769

770

771

772

773

774

775

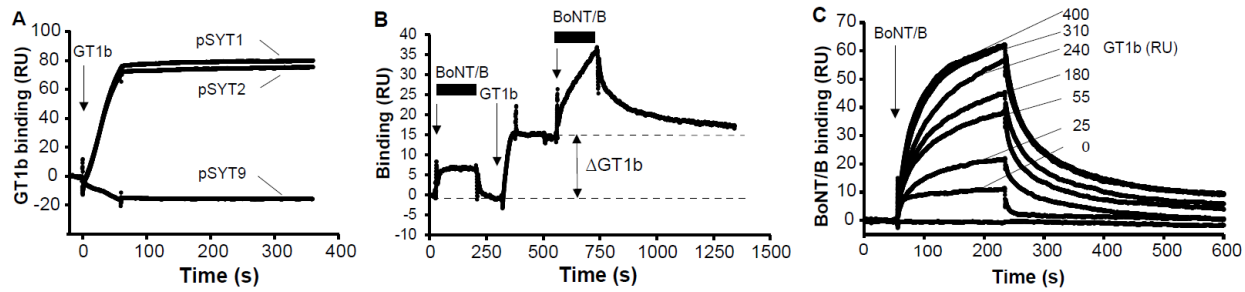

**Fig.1. SPR based on-chip reconstitution of BoNT/B binding to SYT JMD pre-assembled with**

**GT1b** (A) GT1b binding to pSYT1 and pSYT2. GT1b (200 nM) was injected for 1 min over immobilized pSYT1, pSYT2 and pSYT9 (240 RU) at 40  $\mu$ l/min. Representative of >10 independent experiments. (B) GT1b bound to SYT induces an increment in BoNT/B binding signal. BoNT/B (30 nM) was injected (first arrow) onto pSYT1 (260 RU) showing a transient interaction that rapidly returns to baseline level (lower dashed line). GT1b (10 nM, second arrow) was then stably immobilized on pSYT1 ( $\Delta$ GT1b) generating a new baseline (upper dashed line) and BoNT/B (30 nM, third arrow) was then injected again. Black bars highlight the BoNT/B injection phases. Representative of 6 independent experiments. (C) GT1b potentiation of BoNT/B binding to pSYT1 depends on the amount of GT1b bound to pSYT1. Sensorgrams resulting from the interaction of BoNT/B (30 nM) with pSYT1 (300 RU) pre-assembled with various amounts of GT1b (from 0 to 400 RU) were superposed. Representative of 3 independent experiments

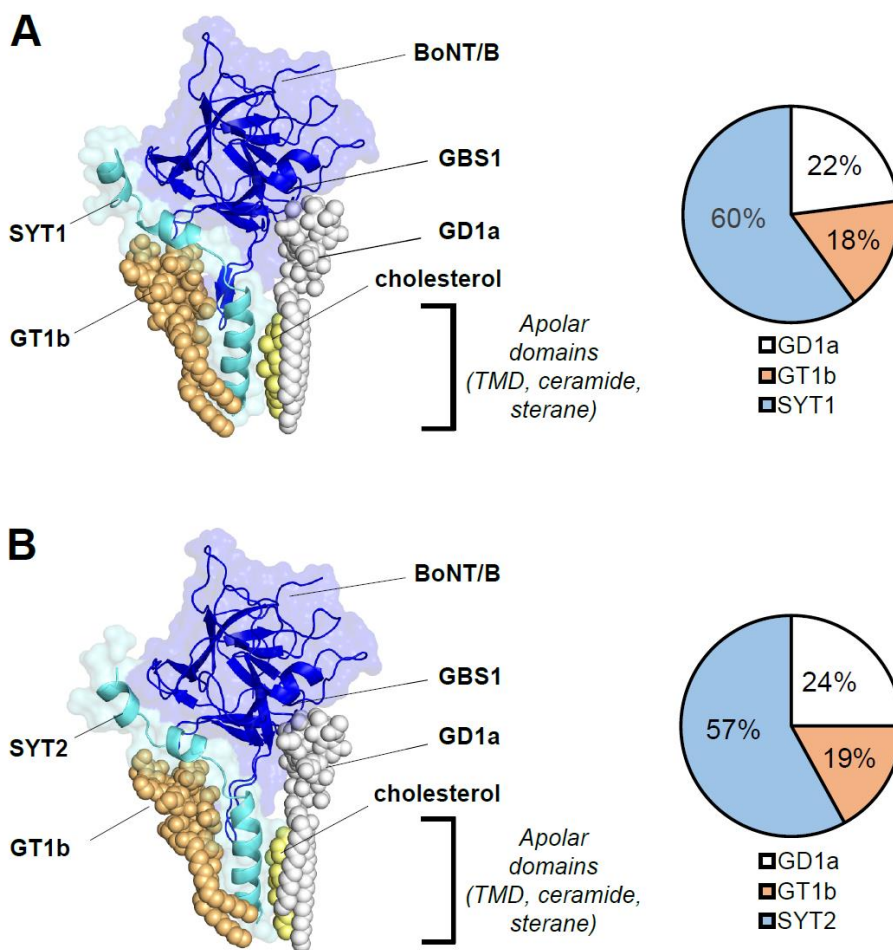

792 **Fig. 2. Overall structure of the energy-minimized complex between BoNT/B and its**  
 793 **membrane ligands.** The models are based on the initial superposition of a preformed  
 794 synaptotagmin1/2-GT1b complex positioned in the SYT binding site of the toxin, also bound to  
 795 GD1a, with a cholesterol molecule positioned between SYT-TM and GD1a ceramide. **(A)** Model  
 796 of SYT1-BoNT/B complex (SYT1 aa 34-72, BoNT/B HC aa 1179-1290). **(B)** Model of SYT2-  
 797 BoNT/B complex (SYT2 aa 42-80, BoNT/B HC aa 1179-1290). Both BoNT/B and SYT are  
 798 represented as cartoons (dark and light blue respectively). The gangliosides and cholesterol are  
 799 represented as spheres (GT1b : light orange, GD1a : white , cholesterol : light yellow). The apolar  
 800 domains indicated in the models correspond to the sterane and isoctyl chains of cholesterol, the  
 801 ceramide part of GD1a and GT1b, and the TMD of SYT. The pie charts indicate the relative  
 802 distribution of the energies of interaction in the complex between BoNT/B and SYT1, GT1b, GD1a  
 803 and between BoNT/B and SYT2, GT1b, GD1a. Note that cholesterol does not interact with the  
 804 toxin, but with SYT TM and the ceramide part of GD1a.

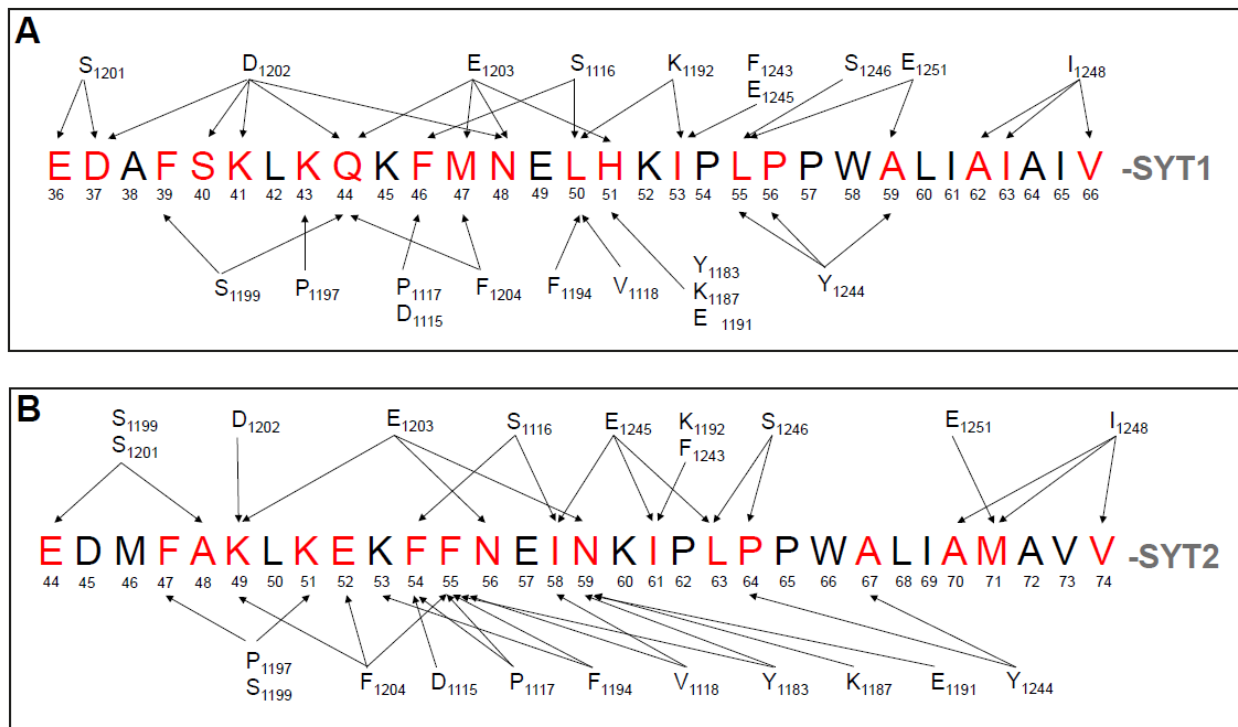

**Fig. 3. Mapping of the intermolecular interactions between BoNT/B and SYT. (A) SYT1. (B) SYT2.** SYT residues interacting with the toxin are highlighted in red. Arrows indicate BoNT/B-SYT interaction points. A cut off  $<3.5 \text{ \AA}$  was used to select the illustrated residues.



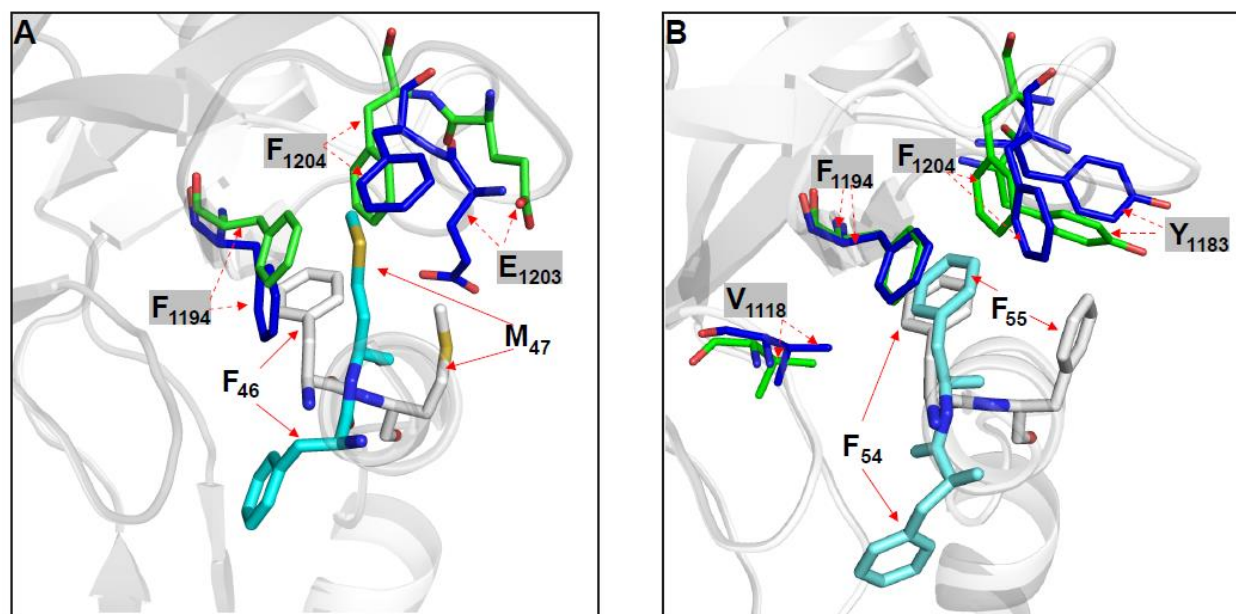

813

814 **Fig. 4. Close-up view of the molecular interface of SYT1-F<sub>46</sub>-M<sub>47</sub> and SYT2-F<sub>54</sub>-F<sub>55</sub>.** (A)  
815 Superposition of the SYT1-BoNT/B complex from PDB: 6G5K (BoNT/B in green and SYT1 in  
816 white) and the present model (BoNT/B in blue and SYT1 in light blue). (B) Superposition of the  
817 SYT2-BoNT/B complex from PDB 2NP0 (BoNT/B in green and SYT2 in white) and the present  
818 model (BoNT/B in blue and SYT2 in light blue). Interacting BoNT/B residues are shaded in  
819 grey. Note that the position of BoNT/B residues are conserved between the proposed models and  
820 the corresponding crystal structures while their relative partners shift from F<sub>46</sub> to M<sub>47</sub> in SYT1 and  
821 F<sub>54</sub> to F<sub>55</sub> in SYT2.

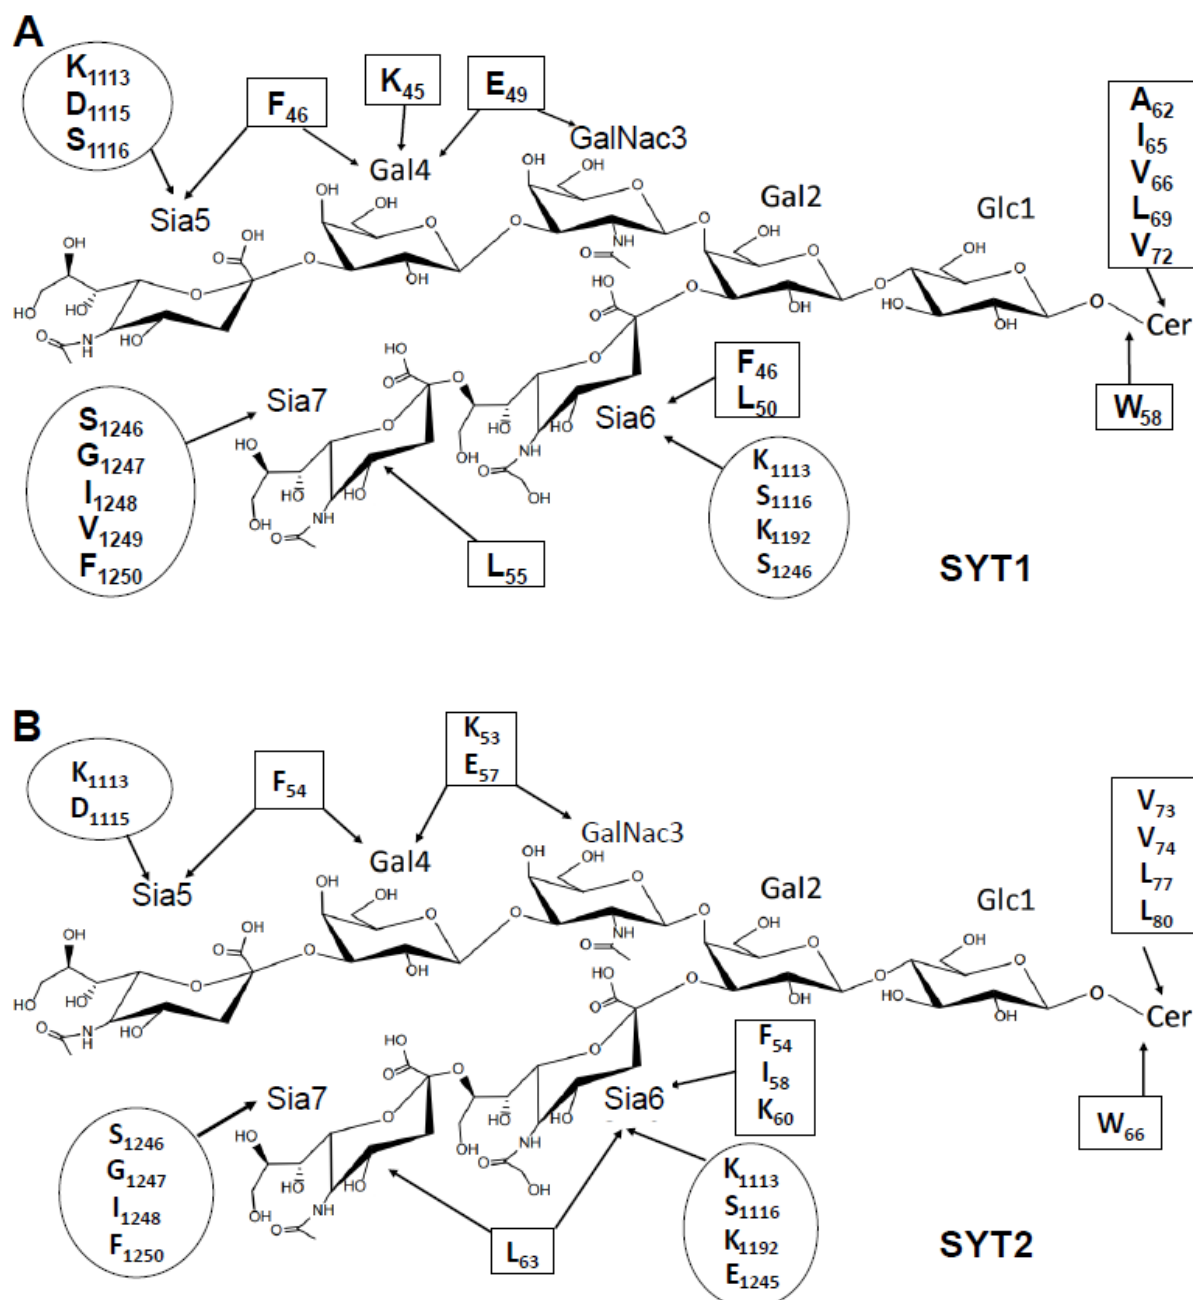

822

823 **Fig. 5. Schematic overview of intermolecular interactions between GT1b-BoNT/B and GT1b-**  
 824 **SYT. (A) SYT1. (B) SYT2.** The amino acids of SYT are boxed while those of the toxin are circled.

825 A cut off  $<3.5 \text{ \AA}$  was used to select the residues indicated in the figure. Glc = glucose, Gal=  
 826 galactose, Gal-Nac= N- acetylgalactosamine, Sia= sialic acid, Cer = ceramide. Only residues with  
 827 energy  $\geq 3 \text{ kJ/mol}$  are listed

828

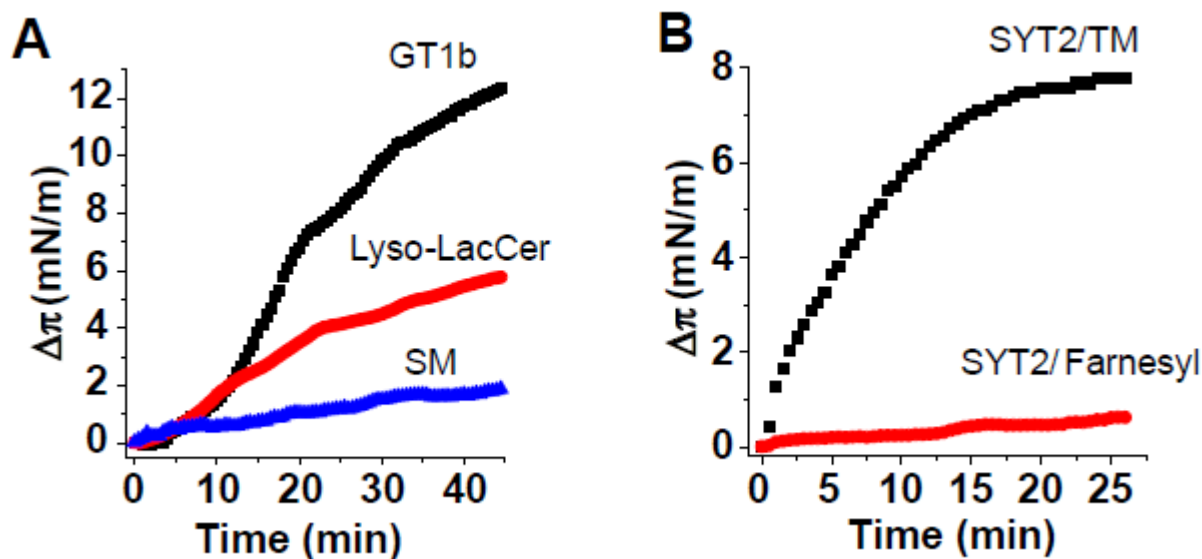

829

830

831 **Fig. 6. Measurement of BoNT/B apolar loop (LBL) interaction with GT1b and SYT using**  
832 **Langmuir monolayers. (A)** Stable monolayers of GT1b, lyso-LacCer, and sphingomyelin (SM)  
833 were prepared at the air-water interface at an initial surface pressure of 15-20 mN.m<sup>-1</sup>. After  
834 equilibrium of the monolayer, the BoNT/B apolar loop (aa 1242-1256) was added at a final  
835 concentration of 10  $\mu$ M. The data show the surface pressure increase  $\Delta\pi$  induced by the loop as a  
836 function of time. The data are representative of three distinct experiments. **(B)** A biotinylated SYT2  
837 peptide encompassing the juxtamembrane domain of SYT as well as the SYT2 transmembrane  
838 domain (aa 40-87) was prepared as a stable monolayer at the air-water interface and then incubated  
839 with the synthetic toxin apolar loop peptide (p1242-1256; 10  $\mu$ M). A SYT2 peptide with a farnesyl  
840 group instead of the TM was used as control. The data show the surface pressure increases  $\Delta\pi$   
841 induced by the BoNT/B apolar loop as a function of time. The data are representative of three  
842 distinct experiments.

843

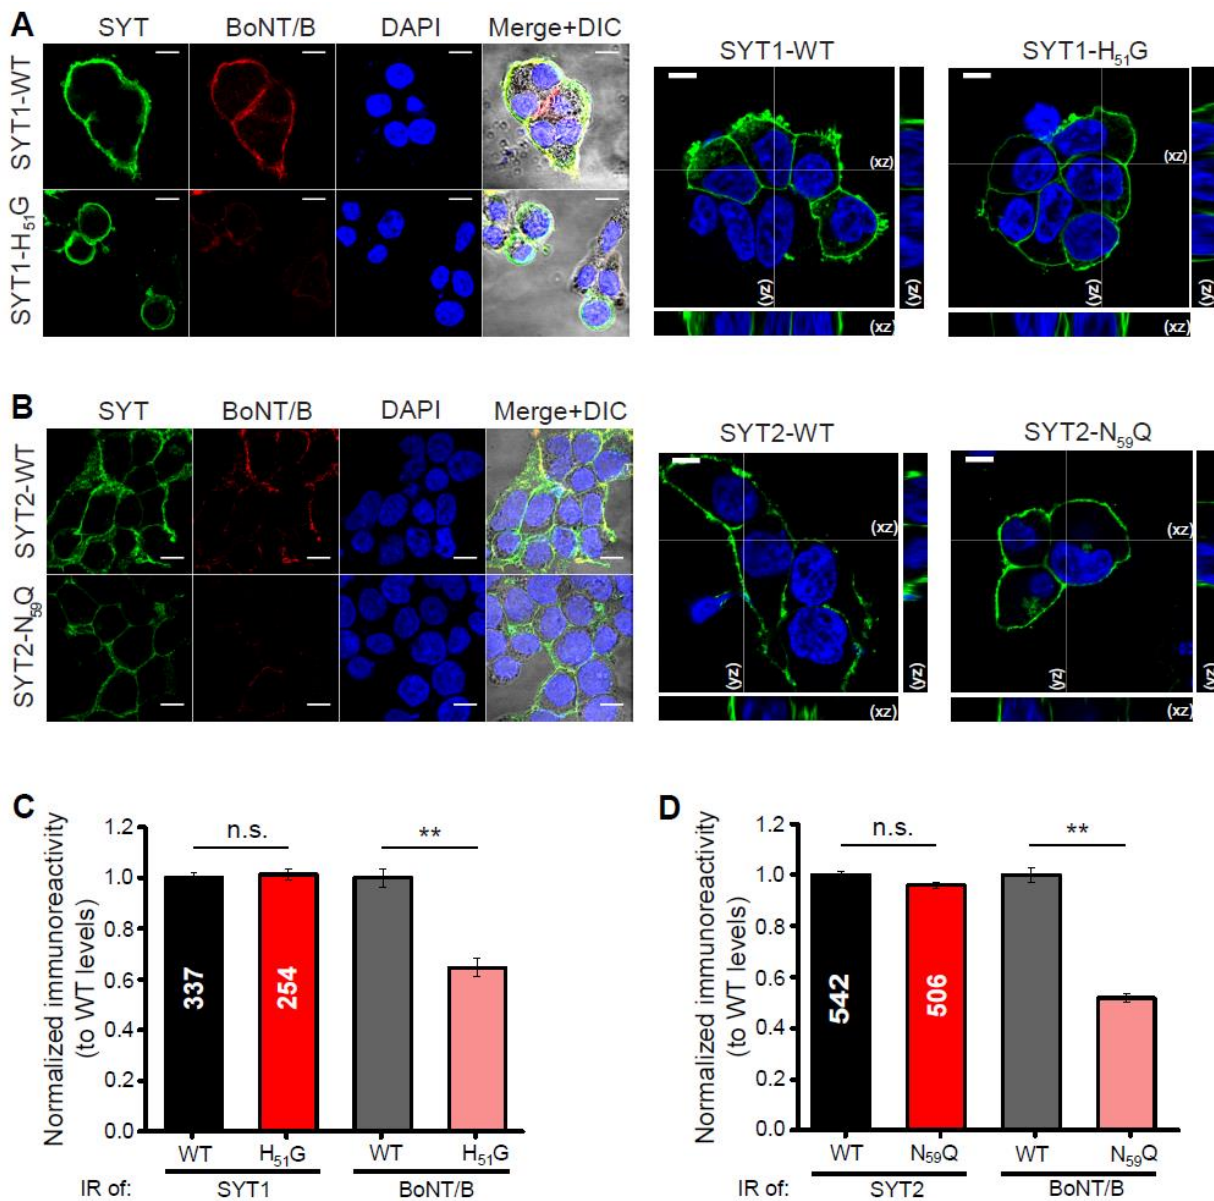

**Fig. 7. Mutations in the BoNT/B binding interface of SYTs decrease the binding of BoNT/B to HEK 293 cells.** (A) Immunostaining of SYT1 (green) and BoNT/B (red) in HEK 293 cells transfected with either SYT1-WT (top) or H<sub>51</sub>G-SYT1 (bottom). DAPI signal is shown in blue, and the merge over DIC images indicated. Orthogonal projections of SYT1 labelling (green) in cells transfected with WT-SYT1 or SYT1-H<sub>51</sub>G (right). Scale bars, 10  $\mu$ m. (B) Immunostaining of SYT2 (green) and BoNT/B (red) in HEK 293 cells transfected with either SYT2-WT (top panels) or SYT2-N<sub>59</sub>Q (bottom panels). DAPI signal is shown in blue, and the merge over DIC images indicated. Orthogonal projections of SYT2 labelling (green) in cells transfected with SYT2-WT or SYT2-N<sub>59</sub>Q (right). Scale bars, 10  $\mu$ m. (C) Quantification of BoNT/B binding (grey and pink) and SYT1 expression (black and red) in cells expressing SYT1-WT or SYT1-H<sub>51</sub>G. The number of ROIs analyzed is indicated within each column. Normalized immunoreactivity data (IR) are

856 expressed as mean  $\pm$  SEM. Mann-Whitney U test was used for comparisons. **\*\*P** < 0.01; n.s., non-  
857 significant. SYT1-WT IR to SYT1-H<sub>51</sub>G IR P=0.64; BoNT/B SYT1-WT to BoNT/B SYT1-H<sub>51</sub>G  
858 P=4.42 x 10<sup>-12</sup>. **(D)** Quantification of BoNT/B binding (grey and pink) and SYT2 expression (black  
859 and red) in cells expressing SYT2-WT or SYT2-N<sub>59</sub>Q. The number of ROIs analyzed is indicated  
860 within each column. Data are expressed as mean  $\pm$  SEM. Mann-Whitney U test was used for  
861 comparisons. **\*\*P** < 0.01; n.s., non-significant. SYT2-WT IR to SYT2-N<sub>59</sub>Q IR P=0.64; BoNT/B  
862 SYT2-WT to BoNT/B SYT2-N<sub>59</sub>Q P<0.001.
